# Supplementary material for: Toxicological Evaluation of a Mixture of Astragalus membranaceus and Panax notoginseng Root Extracts (InnoSlim®)
Source: PubMed Central journal article supplement (PMC6633876; doi:10.1155/2019/5723851), 2019-07-01
Supplement: 5723851.f1.pdf [file 5723851.f1.pdf]

**Table S1. Body Weight Gain in the 28-Day Study**

| Group<br>(mg/kg bw/day) |      | Body weight gain (g) between days |      |      |       |       |       |       |       |       |
|-------------------------|------|-----------------------------------|------|------|-------|-------|-------|-------|-------|-------|
|                         |      | 0-3                               | 3-7  | 7-10 | 10-14 | 14-17 | 17-21 | 21-24 | 24-27 | 0-27  |
| <b>Male</b>             |      |                                   |      |      |       |       |       |       |       |       |
| 0 (Control)<br>(n = 10) | Mean | 18.5                              | 22.7 | 19.9 | 16.0  | 13.9  | 15.9  | 9.5   | 10.5  | 126.9 |
|                         | SD   | 2.0                               | 3.2  | 3.2  | 3.7   | 2.4   | 3.2   | 1.8   | 3.1   | 11.8  |
| 400<br>(n = 10)         | Mean | 20.4                              | 25.3 | 20.8 | 17.3  | 14.7  | 15.9  | 9.7   | 11.4  | 135.5 |
|                         | SD   | 2.3                               | 4.0  | 3.4  | 3.5   | 3.1   | 2.5   | 3.1   | 3.3   | 10.9  |
|                         | SS   |                                   |      |      |       |       |       |       |       |       |
| 800<br>(n = 10)         | Mean | 21.5                              | 24.2 | 20.1 | 16.1  | 14.5  | 14.7  | 10.5  | 12.7  | 134.3 |
|                         | SD   | 3.4                               | 3.6  | 3.8  | 3.4   | 2.3   | 2.8   | 2.5   | 3.4   | 14.5  |
|                         | SS   | *                                 |      |      |       |       |       |       |       |       |
| 1200<br>(n = 10)        | Mean | 22.4                              | 25.1 | 19.2 | 17.8  | 16.1  | 16.6  | 11.2  | 11.7  | 140.1 |
|                         | SD   | 2.3                               | 3.1  | 3.2  | 3.4   | 3.9   | 4.0   | 3.6   | 2.5   | 15.6  |
|                         | SS   | **                                |      |      |       |       |       |       |       |       |
| Test for Significance   |      | DN                                | NS   | NS   | NS    | NS    | NS    | NS    | NS    | NS    |
| <b>Female</b>           |      |                                   |      |      |       |       |       |       |       |       |
| 0 (Control)<br>(n = 10) | Mean | 10.8                              | 12.2 | 8.1  | 11.4  | 6.2   | 11.7  | 0.2   | 7.8   | 68.4  |
|                         | SD   | 3.2                               | 2.3  | 4.2  | 3.0   | 4.3   | 3.7   | 3.6   | 4.8   | 9.9   |
| 400<br>(n = 10)         | Mean | 9.8                               | 12.3 | 9.5  | 11.5  | 7.3   | 10.5  | 1.8   | 4.8   | 67.5  |
|                         | SD   | 2.3                               | 2.3  | 4.2  | 3.4   | 4.0   | 2.5   | 3.3   | 4.1   | 6.5   |
|                         | SS   |                                   |      |      |       |       |       |       |       |       |
| 800<br>(n = 10)         | Mean | 9.8                               | 13.0 | 8.8  | 10.7  | 7.4   | 9.1   | 3.2   | 4.3   | 66.3  |
|                         | SD   | 2.1                               | 2.9  | 4.9  | 3.9   | 5.1   | 3.0   | 3.4   | 3.7   | 10.6  |
|                         | SS   |                                   |      |      |       |       |       |       |       |       |
| 1200<br>(n = 10)        | Mean | 10.5                              | 13.1 | 12.1 | 9.8   | 6.8   | 8.1   | 2.8   | 5.2   | 68.4  |
|                         | SD   | 2.6                               | 3.7  | 4.7  | 4.3   | 3.0   | 3.5   | 2.7   | 4.8   | 14.5  |
|                         | SS   |                                   |      |      |       |       | *     |       |       |       |
| Test for Significance   |      | NS                                | NS   | NS   | NS    | NS    | DN    | NS    | NS    | NS    |

Abbreviations: DN, Duncan's multiple range test; NS, Not Significant; SD, standard deviation; SS, statistically significant compared to control.

\*p < 0.05; \*\*p < 0.01

**Table S2. Food Consumption and Feed Efficiency in the 28-Day Study**

| Group<br>(mg/kg bw/day)  |      | Days<br>Weeks | Food consumption (g/animal/day) |           |            |            | Feed efficiency (g food/ g bwg) |           |            |            |             |
|--------------------------|------|---------------|---------------------------------|-----------|------------|------------|---------------------------------|-----------|------------|------------|-------------|
|                          |      |               | 0-7<br>1                        | 7-14<br>2 | 14-21<br>3 | 21-27<br>4 | 0-7<br>1                        | 7-14<br>2 | 14-21<br>3 | 21-27<br>4 | 0-27<br>1-4 |
| <b>Male</b>              |      |               |                                 |           |            |            |                                 |           |            |            |             |
| 0 (Control)<br>(n = 10)  | Mean |               | 22.3                            | 23.7      | 24.1       | 23.8       | 3.81                            | 4.68      | 5.72       | 7.30       | 5.01        |
|                          | SD   |               | 1.6                             | 1.9       | 1.9        | 1.9        | 0.28                            | 0.58      | 0.55       | 1.21       | 0.26        |
| 400<br>(n = 10)          | Mean |               | 23.3                            | 24.4      | 25.6       | 24.0       | 3.59                            | 4.51      | 5.92       | 7.01       | 4.86        |
|                          | SD   |               | 1.5                             | 2.0       | 1.8        | 2.0        | 0.28                            | 0.46      | 0.77       | 1.22       | 0.34        |
| 800<br>(n = 10)          | Mean |               | 22.5                            | 23.1      | 23.9       | 23.1       | 3.47                            | 4.53      | 5.76       | 6.07       | 4.67        |
|                          | SD   |               | 2.0                             | 1.6       | 1.7        | 1.5        | 0.30                            | 0.47      | 0.62       | 0.79       | 0.26        |
|                          | SS   |               |                                 |           |            |            | *                               |           |            | *          |             |
| 1200<br>(n = 10)         | Mean |               | 22.8                            | 24.0      | 25.5       | 24.4       | 3.37                            | 4.58      | 5.58       | 6.55       | 4.68        |
|                          | SD   |               | 2.4                             | 2.4       | 2.9        | 2.7        | 0.39                            | 0.54      | 0.96       | 1.09       | 0.49        |
|                          | SS   |               |                                 |           |            |            | **                              |           |            |            |             |
| Test for Significance    |      |               | NS                              | NS        | NS         | NS         | DN                              | NS        | NS         | DN         | NS          |
| <b>Female</b>            |      |               |                                 |           |            |            |                                 |           |            |            |             |
| 0 (Control)<br>(n = 10†) | Mean |               | 16.0                            | 17.3      | 18.3       | 17.7       | 5.03                            | 6.69      | 7.63       | 16.88      | 6.93        |
|                          | SD   |               | 0.8                             | 0.9       | 1.2        | 1.6        | 0.83                            | 2.17      | 2.15       | 12.89      | 0.73        |
| 400<br>(n = 10†)         | Mean |               | 16.4                            | 17.1      | 18.5       | 17.6       | 5.24                            | 5.86      | 7.86       | 17.92      | 7.01        |
|                          | SD   |               | 1.7                             | 1.5       | 1.5        | 1.3        | 0.62                            | 0.99      | 2.50       | 13.67      | 0.88        |
| 800<br>(n = 10†)         | Mean |               | 16.4                            | 16.6      | 17.6       | 17.0       | 5.16                            | 6.20      | 8.07       | 14.49      | 7.00        |
|                          | SD   |               | 1.4                             | 1.6       | 1.8        | 1.7        | 0.69                            | 1.32      | 2.28       | 5.63       | 0.86        |
| 1200<br>(n = 10)         | Mean |               | 15.9                            | 16.9      | 17.6       | 17.3       | 4.93                            | 5.75      | 9.10       | 16.91      | 6.86        |
|                          | SD   |               | 1.5                             | 1.8       | 1.9        | 2.5        | 1.02                            | 1.52      | 2.78       | 10.03      | 1.07        |
| Test for Significance    |      |               | NS                              | NS        | NS         | NS         | NS                              | NS        | NS         | NS         | NS          |

Abbreviations: DN, Duncan's multiple range test; NS, Not Significant; SD, standard deviation; SS, statistically significant compared to control.

†Week 4 Feed efficiency (n = 9)

\*p < 0.05; \*\*p < 0.01

**Table S3. Organ Weights in the 28-Day Study**

| Group<br>(mg/kg bw/day)  | Body<br>weight (g) | Organ weight (g) |           |           |           |           |           |           |                         |           |                       |             |
|--------------------------|--------------------|------------------|-----------|-----------|-----------|-----------|-----------|-----------|-------------------------|-----------|-----------------------|-------------|
|                          |                    | Brain            | Liver     | Kidneys   | Heart     | Thymus    | Spleen    | Testes    | Epididymides            | Prostate† | Adrenals              |             |
| <b>Male</b>              |                    |                  |           |           |           |           |           |           |                         |           |                       |             |
| Control<br>(n = 10)      | Mean               | 318.9            | 2.05      | 10.10     | 2.12      | 0.94      | 0.54      | 0.60      | 3.26                    | 1.07      | 1.62                  | 0.073       |
|                          | SD                 | 19.38            | 0.10      | 1.11      | 0.24      | 0.07      | 0.06      | 0.13      | 0.25                    | 0.11      | 0.17                  | 0.011       |
| 400<br>(n = 10)          | Mean               | 325.1            | 2.01      | 9.91      | 2.05      | 0.94      | 0.54      | 0.62      | 3.18                    | 1.07      | 1.69                  | 0.076       |
|                          | SD                 | 16.72            | 0.05      | 1.07      | 0.16      | 0.08      | 0.10      | 0.07      | 0.28                    | 0.14      | 0.32                  | 0.013       |
| 800<br>(n = 10)          | Mean               | 321.2            | 2.00      | 9.59      | 2.14      | 0.92      | 0.47      | 0.63      | 3.33                    | 1.00      | 1.50                  | 0.072       |
|                          | SD                 | 14.02            | 0.06      | 0.76      | 0.16      | 0.07      | 0.06      | 0.09      | 0.17                    | 0.14      | 0.29                  | 0.010       |
|                          | SS                 |                  |           |           |           |           | *         |           |                         |           |                       |             |
| 1200<br>(n = 10)         | Mean               | 324.9            | 2.01      | 9.95      | 2.16      | 0.93      | 0.48      | 0.63      | 3.36                    | 1.09      | 1.61                  | 0.078       |
|                          | SD                 | 20.65            | 0.08      | 1.16      | 0.18      | 0.10      | 0.07      | 0.06      | 0.20                    | 0.13      | 0.25                  | 0.007       |
| Test for Significance    |                    | NS               | NS        | NS        | NS        | NS        | DN        | NS        | NS                      | NS        | NS                    | NS          |
| Historical Control Range |                    | 249.0–316.0      | 1.90–2.21 | 7.09–9.92 | 1.69–2.55 | 0.70–0.98 | 0.49–0.93 | 0.49–0.77 | 2.84–3.54               | 0.66–1.07 | 0.86–1.39             | 0.050–0.087 |
| <b>Female</b>            |                    |                  |           |           |           |           |           |           |                         |           |                       |             |
| 0 (Control)<br>(n = 10)  | Mean               | 202.8            | 1.91      | 6.03      | 1.51      | 0.70      | 0.42      | 0.47      | <b>Ovaries</b><br>0.100 | –         | <b>Uterus</b><br>0.61 | 0.087       |
|                          | SD                 | 12.24            | 0.09      | 0.52      | 0.14      | 0.06      | 0.07      | 0.05      | 0.016                   | –         | 0.16                  | 0.008       |
| 400<br>(n = 10)          | Mean               | 201.0            | 1.90      | 5.62      | 1.45      | 0.65      | 0.40      | 0.48      | 0.094                   | –         | 0.56                  | 0.081       |
|                          | SD                 | 9.98             | 0.09      | 0.39      | 0.10      | 0.04      | 0.06      | 0.05      | 0.012                   | –         | 0.13                  | 0.013       |
| 800<br>(n = 10)          | Mean               | 201.3            | 1.90      | 5.85      | 1.43      | 0.66      | 0.44      | 0.43      | 0.090                   | –         | 0.56                  | 0.081       |
|                          | SD                 | 15.87            | 0.08      | 0.76      | 0.12      | 0.05      | 0.10      | 0.05      | 0.020                   | –         | 0.16                  | 0.010       |
| 1200<br>(n = 10)         | Mean               | 203.8            | 1.87      | 6.02      | 1.41      | 0.63      | 0.41      | 0.49      | 0.095                   | –         | 0.52                  | 0.082       |
|                          | SD                 | 20.35            | 0.09      | 0.86      | 0.13      | 0.06      | 0.09      | 0.10      | 0.016                   | –         | 0.15                  | 0.012       |
|                          | SS                 |                  |           |           |           | *         |           |           |                         |           |                       |             |
| Test for Significance    |                    | NS               | NS        | NS        | NS        | DN        | NS        | NS        | NS                      | –         | NS                    | NS          |
| Historical Control Range |                    | 160–195          | 1.75–1.98 | 4.74–6.61 | 1.20–1.61 | 0.54–0.66 | 0.28–0.59 | 0.32–0.54 | 0.081–0.113             | –         | 0.35–0.56             | 0.055–0.099 |

Abbreviations: DN, Duncan's multiple range test; NS, Not Significant; SD, standard deviation; SS, statistically significant compared to control.

†Prostate with seminal vesicles and coagulating gland as a whole.

\*p < 0.05

Remarks: Paired organs were weighed together.

**Table S4. Organ Weights Relative to Body Weight in the 28-Day Study**

| Group<br>(mg/kg bw/day)  |      | Organ weight relative to body weight (%) |           |           |           |           |           |                         |              |                        |             |
|--------------------------|------|------------------------------------------|-----------|-----------|-----------|-----------|-----------|-------------------------|--------------|------------------------|-------------|
|                          |      | Brain                                    | Liver     | Kidneys   | Heart     | Thymus    | Spleen    | Testes                  | Epididymides | Prostate†              | Adrenals    |
| <b>Male</b>              |      |                                          |           |           |           |           |           |                         |              |                        |             |
| Control<br>(n = 10)      | Mean | 0.646                                    | 3.162     | 0.663     | 0.295     | 0.169     | 0.187     | 1.020                   | 0.337        | 0.508                  | 0.023       |
|                          | SD   | 0.047                                    | 0.229     | 0.054     | 0.012     | 0.021     | 0.035     | 0.039                   | 0.027        | 0.035                  | 0.003       |
| 400<br>(n = 10)          | Mean | 0.618                                    | 3.044     | 0.630     | 0.290     | 0.167     | 0.192     | 0.978                   | 0.327        | 0.520                  | 0.023       |
|                          | SD   | 0.023                                    | 0.231     | 0.041     | 0.012     | 0.030     | 0.020     | 0.087                   | 0.038        | 0.103                  | 0.003       |
| 800<br>(n = 10)          | Mean | 0.623                                    | 2.982     | 0.666     | 0.286     | 0.145     | 0.195     | 1.038                   | 0.313        | 0.466                  | 0.022       |
|                          | SD   | 0.034                                    | 0.121     | 0.032     | 0.017     | 0.016     | 0.023     | 0.059                   | 0.049        | 0.081                  | 0.003       |
|                          | SS   |                                          |           |           |           | *         |           |                         |              |                        |             |
| 1200<br>(n = 10)         | Mean | 0.621                                    | 3.057     | 0.667     | 0.286     | 0.148     | 0.193     | 1.039                   | 0.337        | 0.495                  | 0.024       |
|                          | SD   | 0.053                                    | 0.212     | 0.057     | 0.026     | 0.023     | 0.017     | 0.104                   | 0.050        | 0.067                  | 0.002       |
| Test for Significance    |      | NS                                       | NS        | NS        | NS        | DN        | NS        | NS                      | NS           | NS                     | NS          |
| Historical Control Range |      | 0.65–0.82                                | 2.82–3.57 | 0.68–0.95 | 0.28–0.36 | 0.17–0.36 | 0.17–0.29 | 1.00–1.29               | 0.24–0.37    | 0.30–0.49              | 0.020–0.033 |
| <b>Female</b>            |      |                                          |           |           |           |           |           |                         |              |                        |             |
| 0 (Control)<br>(n = 10)  | Mean | 0.943                                    | 2.974     | 0.745     | 0.343     | 0.208     | 0.234     | <b>Ovaries</b><br>0.050 | –            | <b>Uterus</b><br>0.303 | 0.043       |
|                          | SD   | 0.077                                    | 0.198     | 0.050     | 0.030     | 0.032     | 0.023     | 0.008                   | –            | 0.085                  | 0.003       |
| 400<br>(n = 10)          | Mean | 0.945                                    | 2.800     | 0.723     | 0.326     | 0.198     | 0.239     | 0.047                   | –            | 0.279                  | 0.040       |
|                          | SD   | 0.050                                    | 0.174     | 0.032     | 0.022     | 0.028     | 0.026     | 0.006                   | –            | 0.060                  | 0.006       |
| 800<br>(n = 10)          | Mean | 0.949                                    | 2.898     | 0.710     | 0.329     | 0.218     | 0.215     | 0.045                   | –            | 0.277                  | 0.040       |
|                          | SD   | 0.070                                    | 0.193     | 0.026     | 0.019     | 0.048     | 0.021     | 0.008                   | –            | 0.075                  | 0.004       |
|                          | SS   |                                          |           | *         |           |           |           |                         |              |                        |             |
| 1200<br>(n = 10)         | Mean | 0.924                                    | 2.947     | 0.695     | 0.310     | 0.203     | 0.241     | 0.046                   | –            | 0.258                  | 0.040       |
|                          | SD   | 0.090                                    | 0.224     | 0.036     | 0.016     | 0.040     | 0.028     | 0.006                   | –            | 0.086                  | 0.007       |
|                          | SS   |                                          |           | **        | **        |           |           |                         |              |                        |             |
| Test for Significance    |      | NS                                       | NS        | DN        | DN        | NS        | NS        | NS                      | –            | NS                     | NS          |
| Historical Control Range |      | 0.91–1.19                                | 2.83–3.72 | 0.66–0.89 | 0.28–0.37 | 0.15–0.34 | 0.19–0.32 | 0.043–0.059             | –            | 0.19–0.31              | 0–0         |

Abbreviations: DN, Duncan's multiple range test; NS, Not Significant; SD, standard deviation; SS, statistically significant compared to control.

†Prostate with seminal vesicles and coagulating gland as a whole.

\*p < 0.05; \*\*p < 0.01

**Table S5. Organ Weights Relative to Brain Weight in the 28-Day Study**

| Group<br>(mg/kg bw/day)  |      | Body weight | Organ weight and body weight relative to brain weight (%) |           |           |           |           |                        |              |                        | Prostate† | Adrenals |
|--------------------------|------|-------------|-----------------------------------------------------------|-----------|-----------|-----------|-----------|------------------------|--------------|------------------------|-----------|----------|
|                          |      |             | Liver                                                     | Kidneys   | Heart     | Thymus    | Spleen    | Testes                 | Epididymides |                        |           |          |
| <b>Male</b>              |      |             |                                                           |           |           |           |           |                        |              |                        |           |          |
| Control<br>(n = 10)      | Mean | 15550.8     | 492.17                                                    | 103.14    | 45.90     | 26.21     | 29.16     | 158.63                 | 52.28        | 79.03                  | 3.55      |          |
|                          | SD   | 1089.95     | 54.54                                                     | 10.94     | 3.75      | 3.06      | 6.46      | 12.30                  | 4.96         | 8.68                   | 0.51      |          |
| 400<br>(n = 10)          | Mean | 16210.4     | 494.06                                                    | 102.08    | 47.04     | 27.03     | 31.04     | 158.50                 | 53.09        | 84.30                  | 3.76      |          |
|                          | SD   | 615.09      | 48.91                                                     | 7.17      | 3.06      | 5.00      | 3.20      | 14.50                  | 6.73         | 16.39                  | 0.56      |          |
| 800<br>(n = 10)          | Mean | 16089.4     | 480.45                                                    | 107.18    | 46.08     | 23.33     | 31.39     | 166.74                 | 50.04        | 75.00                  | 3.62      |          |
|                          | SD   | 866.33      | 42.19                                                     | 7.61      | 3.73      | 2.81      | 3.89      | 8.87                   | 6.05         | 14.39                  | 0.56      |          |
| 1200<br>(n = 10)         | Mean | 16203.5     | 496.50                                                    | 107.70    | 46.25     | 23.81     | 31.27     | 167.22                 | 54.04        | 80.23                  | 3.89      |          |
|                          | SD   | 1427.38     | 68.75                                                     | 8.32      | 4.72      | 3.32      | 3.18      | 9.38                   | 4.97         | 13.82                  | 0.35      |          |
| Test for Significance    |      | NS          | NS                                                        | NS        | NS        | NS        | NS        | NS                     | NS           | NS                     | NS        |          |
| Historical Control Range |      | 12184–15340 | 344–492                                                   | 83–133    | 34.3–48.2 | 24.5–47.7 | 23.8–39.1 | 140.2–171.8            | 33.8–51.9    | 41.0–69.5              | 2.4–4.4   |          |
| <b>Female</b>            |      |             |                                                           |           |           |           |           |                        |              |                        |           |          |
| 0 (Control)<br>(n = 10)  | Mean | 10669.3     | 317.17                                                    | 79.51     | 36.53     | 22.16     | 24.92     | <u>Ovaries</u><br>5.26 | –            | <u>Uterus</u><br>32.26 | 4.57      |          |
|                          | SD   | 855.60      | 30.31                                                     | 8.17      | 3.22      | 3.80      | 2.62      | 0.80                   | –            | 8.98                   | 0.51      |          |
| 400<br>(n = 10)          | Mean | 10613.5     | 297.62                                                    | 76.66     | 34.55     | 20.98     | 25.31     | 4.96                   | –            | 29.61                  | 4.28      |          |
|                          | SD   | 559.36      | 30.08                                                     | 4.54      | 3.14      | 2.82      | 2.72      | 0.78                   | –            | 6.48                   | 0.72      |          |
| 800<br>(n = 10)          | Mean | 10582.8     | 307.17                                                    | 75.03     | 34.79     | 23.08     | 22.77     | 4.74                   | –            | 29.39                  | 4.23      |          |
|                          | SD   | 762.97      | 34.81                                                     | 5.05      | 2.33      | 5.37      | 2.62      | 1.02                   | –            | 8.03                   | 0.48      |          |
| 1200<br>(n = 10)         | Mean | 10916.0     | 321.96                                                    | 75.57     | 33.73     | 22.04     | 26.45     | 5.08                   | –            | 27.85                  | 4.36      |          |
|                          | SD   | 1089.27     | 42.85                                                     | 5.53      | 2.97      | 4.41      | 5.49      | 0.94                   | –            | 8.44                   | 0.55      |          |
| Test for Significance    |      | NS          | NS                                                        | NS        | NS        | NS        | NS        | NS                     | –            | NS                     | NS        |          |
| Historical Control Range |      | 8421–10971  | 249–378                                                   | 65.9–92.0 | 27.3–37.7 | 15.1–33.0 | 17.3–30.5 | 4.24–6.46              | –            | 18.3–29.5              | 2.88–5.38 |          |

Abbreviations: NS, Not Significant; SD, standard deviation.

†Prostate with seminal vesicles and coagulating gland as a whole.

Remarks: Paired organs were weighed together.
